# Supplementary material
Source: PubMed Central journal article supplement (PMC7210930)
Supplement: 42003_2020_959_MOESM3_ESM.pdf [file 42003_2020_959_MOESM3_ESM.pdf]

**Supplementary Table 1: Relative expression levels of RLK genes in transgenic Arabidopsis leaves**

| Line  | Clone name    | Accession number | Conserved motif of ectodomain | mean*  | SE*   |
|-------|---------------|------------------|-------------------------------|--------|-------|
| R1    | GMFL01-36-K12 | AK245648         | RCC1                          | 4.260  | 2.608 |
| R2    | GMFL01-06-C24 | AK244534         | GUB_WAK_bind                  | 6.830  | 1.564 |
| R3    | GMFL01-06-N22 | AK244566         | EGF/GUB_WAK_bind              | 34.762 | 3.324 |
| R4    | GMFL01-05-J08 | AK285234         | LRR                           | 0.025  | 0.003 |
| R5    | GMFL01-30-D17 | AK245428         | LRR                           | 0.015  | 0.008 |
| R5-2  |               |                  |                               | 0.006  | 0.003 |
| R6    | GMFL01-36-D09 | AK286757         | Malectin                      | 0.239  | 0.035 |
| R7    | GMFL01-26-P11 | AK245323         | Malectin                      | 0.058  | 0.024 |
| R8    | GMFL01-38-G21 | AK286845         | Malectin                      | 4.382  | 0.520 |
| R9    | GMFL01-01-N11 | AK244005         | not found                     | 2.531  | 0.127 |
| R10   | GMFL01-40-A08 | AK245733         | not found                     | 8.386  | 0.639 |
| R11   | GMFL01-01-J09 | AK243908         | not found                     | 4.362  | 0.350 |
| R12   | GMFL01-43-N13 | AK245867         | Lectin                        | 46.551 | 6.410 |
| R13   | GMFL01-39-B18 | AK286868         | Lectin                        | 2.312  | 0.764 |
| R14   | GMFL01-17-D12 | AK285833         | PRICHEXTENSN                  | 0.004  | 0.001 |
| R14-2 |               |                  |                               | 0.003  | 0.000 |
| R15   | GMFL01-02-E18 | AK244175         | USP                           | 2.445  | 0.264 |

Relative transcript abundances were determined after normalization of raw signals with the abundance of the housekeeping transcript of an *ACT8* gene (*at1g49240*). All the individual data points are shown with the means and standard errors ( $n = 4-6$ ).

Conserved motifs were predicted using an InterPro (<http://www.ebi.ac.uk/interpro/>).

EGF, epidermal growth factor-like domain; GUB\_WAK\_bind, wall-associated receptor kinase galacturonan-binding; LRR, leucine-rich repeat; PRICHEXTENSN, proline rich extensin signature; RCC1, regulator of chromosome condensation 1; USP, universal stress protein family.

Supplementary Table 2: Primers

| Purpose                     | Plant                               | Gene (GAI code)                                | Forward primer sequence (5' to 3')                 | Reverse primer sequence (5' to 3')                        | Remarks |
|-----------------------------|-------------------------------------|------------------------------------------------|----------------------------------------------------|-----------------------------------------------------------|---------|
| RT-qPCR                     | Arabidopsis                         | ACT8 (At1g49240)                               | TGCTGGTCGTGACCTTACTG                               | CGAGGTCCTCACTCTTGCT                                       |         |
|                             |                                     | PDF1.2 (At5g44420)                             | CGAACATGGTGTGGTGGG                                 | ATGTGCCATTCGAGCAAGAT                                      |         |
|                             |                                     | TI (At2g43510)                                 | GTGATGTTGGTTTCGGCTTT                               | CTGTGGAGTATCGTCGCAGA                                      |         |
|                             |                                     | AtHAK1 (At1g06840)                             | ATGGCAGGAAAGAGAGCTGA                               | GGTGGGCAGTCAGAACAAAT                                      |         |
|                             |                                     | At5g01950                                      | TTGGCACTGAGGTGTAGCC                                | TTCCGACGACGATGTTGACAG                                     |         |
|                             | Soybean                             | ACT (GQ339774.1)                               | CATCCAGGCTGTCTCTCTC                                | CAGCGAGATCCAAACGAAGG                                      |         |
|                             |                                     | PR (HQ913577)                                  | CGGAGCCATTGGAGAAGATA                               | GCAGATCTCTCTGCCAGT                                        |         |
|                             |                                     | TI (AF128268.1)                                | TTCCCTTTCTTCTGCCT                                  | TCCGGCTAGTTCAATCCA                                        |         |
|                             |                                     | R1 (AK245648)                                  | CAGTGGCTACGTCGGTTAT                                | GAATCGGTGGTGGACCTAGA                                      |         |
|                             |                                     | R2 (AK244534)                                  | AGGTGTTGGAGGCTATGGTG                               | AGGTGCGGTGGTAACTTG                                        |         |
|                             |                                     | R3 (AK244566)                                  | GTTCCGCTTTAGGTTGCTG                                | GCAGTTCCGGTAGCAATGGT                                      |         |
|                             |                                     | R4 (AK285234)                                  | AAACCAAGGACCGAAGGAGT                               | TTGTTTCGAGAAATGGCTCT                                      |         |
|                             |                                     | R5 (AK245428)                                  | CCTTGGCTGTTTCGTTTTGT                               | GCTGCACATGGATCTCCTTT                                      |         |
|                             |                                     | R6 (AK286757)                                  | AAGGCAGCATGGGATTTTG                                | GCGACACCTGTTCTTCTCC                                       |         |
|                             |                                     | R7 (AK245323)                                  | CATAGCTGAAAAGCCGTGTCA                              | TGGAAGAAGAGGCGAAGAAA                                      |         |
|                             |                                     | R8 (AK286845)                                  | TCATCATCGCTACCAACCAA                               | ACGGGTGTTGAACTGTCCTC                                      |         |
|                             |                                     | R9 (AK244005)                                  | ATCCAGCGGCTTCTGATTTA                               | CCATTTCTCGTGCAGGTAT                                       |         |
|                             |                                     | R10 (AK245733)                                 | CCTGAGGGGATGACTCACAT                               | CGGTTTGAAGTGCTTTCTC                                       |         |
|                             |                                     | R11 (AK243908)                                 | TGTGGCTAAGGTCTTGCTT                                | TCCCTCATACCTTGCTTGG                                       |         |
|                             |                                     | R12 (AK245867)                                 | GCTTTCTAACGGCGCAATAG                               | ATCTGTGCGGCCAGTACTCT                                      |         |
| R13 (AK286868)              | ATCCCTTCAATCCCGTAAC                 | TCCTTCCGAGGTTTTGTGCG                           |                                                    |                                                           |         |
| R14 (AK285833)              | ACACGAGCTTTGGAAGAGGA                | AACAACCTGGCTCATCCTTG                           |                                                    |                                                           |         |
| R15 (AK244175)              | CTCTTGTGGGGTGAGTGGT                 | ATAATCGGCACAAGGACGAG                           |                                                    |                                                           |         |
|                             | GLYMA11G200300                      | ATCTTCAAAGAGTTCAAG                             | AATCAAACGCCTTAAATGG                                |                                                           |         |
|                             | GLYMA07G004700                      | ATAGGGCCGTTAGGTTTC                             | CTGAAGTGTGCCACCAGCTA                               |                                                           |         |
| Gene cloning                | R1                                  | <u>CCACCCACCACCACA</u> ATGGCACCTTTTCTCATTA     | <u>TCCAGCACTAGCTCCAGA</u> CTATTGTGAAGAAATAGAAT     | underline: S1- or T1-linker sequences                     |         |
|                             | R2                                  | <u>CCACCCACCACCACA</u> ATGACGACAGACTCTTCCT     | <u>TCCAGCACTAGCTCCAGA</u> CTAGTTCTCCACTACCTTG      | underline: S1- or T1-linker sequences                     |         |
|                             | R3                                  | <u>CCACCCACCACCACA</u> ATGTTTATTTCTCGTACCA     | <u>TCCAGCACTAGCTCCAGA</u> TTAGTAGATTTTATGTCTCT     | underline: S1- or T1-linker sequences                     |         |
|                             | R4                                  | <u>CCACCCACCACCACA</u> ATGAACTCCCTAAAATACTT    | <u>TCCAGCACTAGCTCCAGA</u> TAACTAACTAGGTTCATTT      | underline: S1- or T1-linker sequences                     |         |
|                             | R5 (GmHAK1)                         | <u>CCACCCACCACCACA</u> ATGCCGGCTCTGAGAATTCA    | <u>TCCAGCACTAGCTCCAGA</u> TCAGCGAGGAACAACGGTGGG    | underline: S1- or T1-linker sequences                     |         |
|                             |                                     |                                                | <u>TCCAGCACTAGCTCCAGA</u> GCGAGGAACAACGGTGGGAA     | without stop codon; underline: T1-linker sequences        |         |
|                             | R6                                  | <u>CCACCCACCACCACA</u> ATGCCAAGTGATTGTATTA     | <u>TCCAGCACTAGCTCCAGA</u> TCAACGTGGCTTTGGATCCA     | underline: S1- or T1-linker sequences                     |         |
|                             | R7                                  | <u>CCACCCACCACCACA</u> ATGGACACCCTGACACACG     | <u>TCCAGCACTAGCTCCAGA</u> TTATCGTCCCTTTGGATCCT     | underline: S1- or T1-linker sequences                     |         |
|                             | R8                                  | <u>CCACCCACCACCACA</u> ATGTGTGCTGCTTCCATTG     | <u>TCCAGCACTAGCTCCAGA</u> TCATCGTCTTTTGGATCCT      | underline: S1- or T1-linker sequences                     |         |
|                             | R9                                  | <u>CCACCCACCACCACA</u> ATGAAAGTGTTTCCATTCTC    | <u>TCCAGCACTAGCTCCAGA</u> TCAACATGTTCTTACAAGCT     | underline: S1- or T1-linker sequences                     |         |
|                             | R10                                 | <u>CCACCCACCACCACA</u> ATGTCCTTCCCTTCTATTA     | <u>TCCAGCACTAGCTCCAGA</u> TCAATCCGTGGTACAGTCT      | underline: S1- or T1-linker sequences                     |         |
|                             | R11                                 | <u>CCACCCACCACCACA</u> ATGGATAAGCAAAATTTGTT    | <u>TCCAGCACTAGCTCCAGA</u> CTATACTGTG CTCATCCTTG    | underline: S1- or T1-linker sequences                     |         |
|                             | R12                                 | <u>CCACCCACCACCACA</u> ATGTCTCATTTCCAAAACCCC   | <u>TCCAGCACTAGCTCCAGA</u> TCAAACCGGAGGAGGGGAGG     | underline: S1- or T1-linker sequences                     |         |
|                             | R13                                 | <u>CCACCCACCACCACA</u> ATGAATTTCTTAGCTCTATC    | <u>TCCAGCACTAGCTCCAGA</u> TTAGCGTCCAACACTTTGAA     | underline: S1- or T1-linker sequences                     |         |
|                             | R14 (GmHAK2)                        | <u>CCACCCACCACCACA</u> ATGTCAACTGCCCCGCGCC     | <u>TCCAGCACTAGCTCCAGA</u> TCAAGAGCTTCCACTGAAAC     | underline: S1- or T1-linker sequences                     |         |
|                             |                                     | <u>TCCAGCACTAGCTCCAGA</u> AGAGCTTCCACTGAAACCTT | without stop codon; underline: T1-linker sequences |                                                           |         |
|                             |                                     | <u>TCCAGCACTAGCTCCAGA</u> TTAGTCAAAACTTGAAGATC | underline: S1- or T1-linker sequences              |                                                           |         |
|                             | R15                                 | <u>CCACCCACCACCACA</u> ATGATGTTAATCGGCGACGG    | <u>TCCAGCACTAGCTCCAGA</u> TCTAGGTGCAACTGAGGGAG     | without stop codon; underline: S1- or T1-linker sequences |         |
|                             | AtHAK1                              | <u>CCACCCACCACCACA</u> ATGTTTTGACCCATCATGT     | <u>TCCAGCACTAGCTCCAGA</u> TCTAGGTGCAACTGAGGGAG     | without stop codon; underline: S1- or T1-linker sequences |         |
|                             |                                     | GGGGACAAGTTTGTACAAAAAAGCAGGCTTCCACCCACCACCAAT  | GGGGACCACTTTGTACAAGAAAGCTGGGTCTCCAGCACTAGCTCCAGA   | 2nd GW-primers; underline: S1- or T1-linker sequences     |         |
| E.coli protein synthesis    | pET23a                              | CACCACCACCACCACCTGA                            | ATGTATACTCTTCTTAA                                  | inverse PCR primers                                       |         |
|                             | GFP                                 | GAAGGAGATATACATATGAGTAAAGGAGAAGAACT            | GTGGTGGTGGTGGTGTGGTATGATATAGTTCATCCATGC            | underline: adapter sequence for infusion cloning          |         |
|                             | GmHAK1                              | GAAGGAGATATACATATGTCACTACCAACAGACCTTTC         | GTGGTGGTGGTGGTGTGGTATGCCCACATTTATCT                | underline: adapter sequence for infusion cloning          |         |
|                             | GmHAK2                              | CCACCCACCACCACAATGTCAACTGCCCCGCGCC             | TCCAGCACTAGCTCCAGACTACGAAATACTCGACGAGG             | underline: S1- or T1-linker sequences                     |         |
| Cell-free protein synthesis | pEU-GW-AGIA, pEU-GW-bl, pEU-GW-FLAG | GCGTAGCATTTAGGTGACACT                          | CCTGCGCTGGGAAGATAAAC                               | "Split-Primer" PCR                                        |         |
| VIGS                        | GmHAK1                              | AACTCGAGAGTGGGGTGAAATTCCTT                     | TTGGATCCTGATGGTATGGGTCCAGTGA                       | underline: XhoI or BamHI site                             |         |
|                             | GmHAK2                              | AACTCGAGCCGTCCACTCTTCTGCTTC                    | TTGGATCCCGATCCGGACGGAGGAGAGG                       | underline: XhoI or BamHI site                             |         |

**a**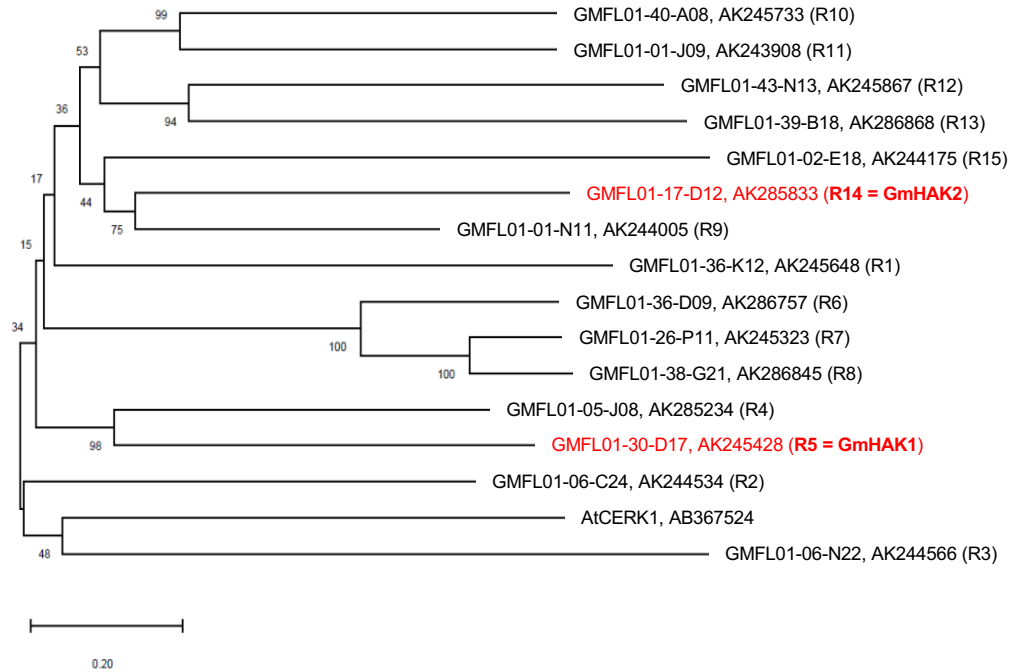**b**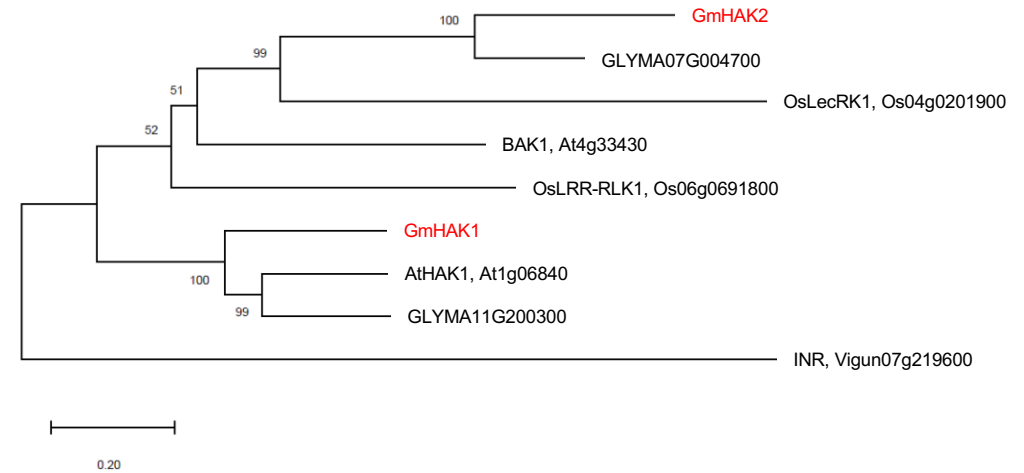

**Supplementary Figure 1:** Phylogenetic tree inferred from deduced amino acid sequences of the soybean RLKs selected as research targets (**a**) and GmHAK candidates and other RLK proteins that have been reported to serve as herbivore-derived danger signals (**b**) in several plant taxa. Phylogenetic tree was generated by MEGA5 software (<https://www.megasoftware.net/>), using the neighbor-joining method.

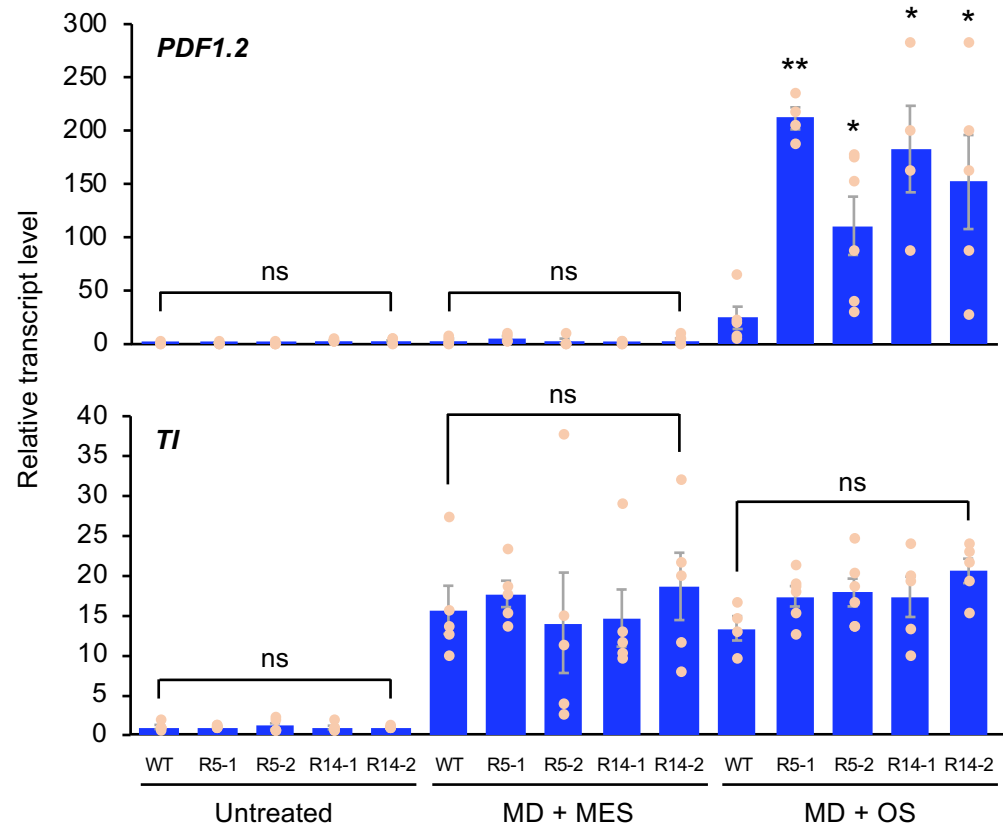

**Supplementary Figure 2:** Transcript levels of the *PDF1.2* and *trypsin inhibitor (TI)* genes in leaves of wild-type (WT) and GmHAK1- or GmHAK2-overexpression lines (R5-1, R5-2, R14-1, and R14-2) of Arabidopsis plants at 24 h after mechanical damage (MD) with or without application of OS from *Spodoptera litura*. All the individual data points are shown with the means and standard errors ( $n = 4-6$ ). Data marked with an asterisk are significantly different from those of WT, based on an ANOVA with Holm's sequential Bonferroni post hoc test (\*\*,  $0.001 \leq P < 0.01$ ; \*,  $0.01 \leq P < 0.05$ ). ns, not significant.

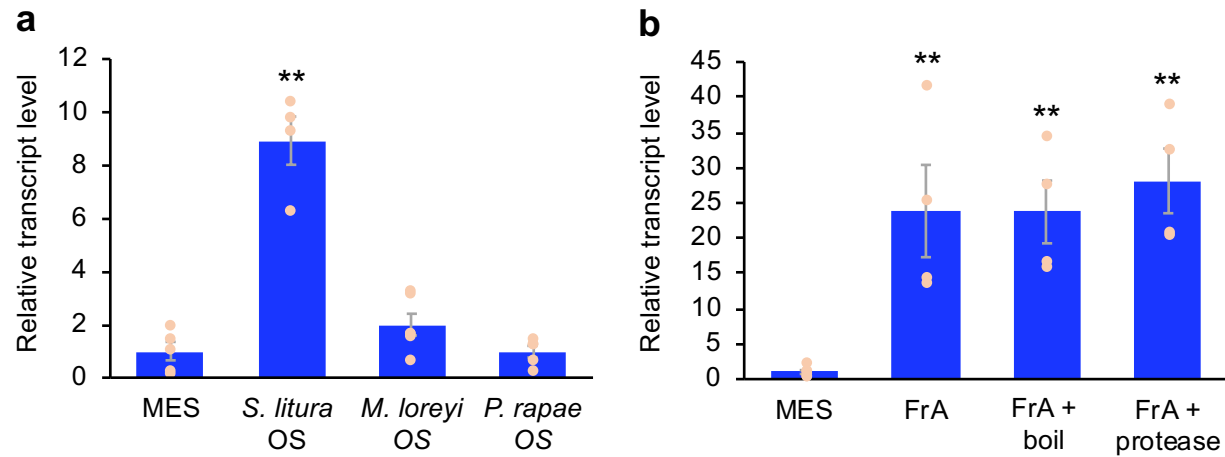

**Supplementary Figure 3:** Transcript levels of *PDF1.2* in leaves of wild-type (WT) *Arabidopsis* plants at 24 h after treatment by mechanical damage with application of OS collected from *Spodoptera litura*, *Mythimna loreyi* or *Pieris rapae* larvae (**a**) as well as boiled and protease-treated OS from *S. litura* (**b**). Treatment of mechanically damaged WT leaves with MES buffer served as control. All the individual data points are shown with the means and standard errors ( $n = 4-6$ ). Data marked with an asterisk are significantly different from those of MES treatment, based on an ANOVA with Holm's sequential Bonferroni post hoc test (\*\*,  $0.001 \leq P < 0.01$ ).

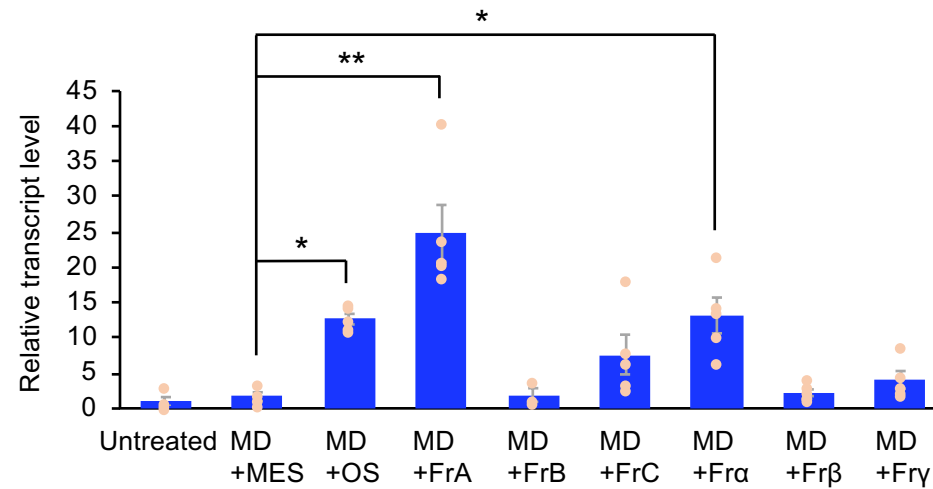

**Supplementary Figure 4:** Transcript levels of *pathogenesis-related (PR)* gene in soybean leaves 24 h after mechanical damage (MD) with application of MES buffer or individual OS fractions (see Fig. 2). All the individual data points are shown with the means and standard errors ( $n = 3-6$ ). Data marked with an asterisk are significantly different from those of MES treatment, based on an ANOVA with Holm's sequential Bonferroni post-hoc test (\*\*,  $0.001 \leq P < 0.01$ ; \*,  $0.01 \leq P < 0.05$ ).

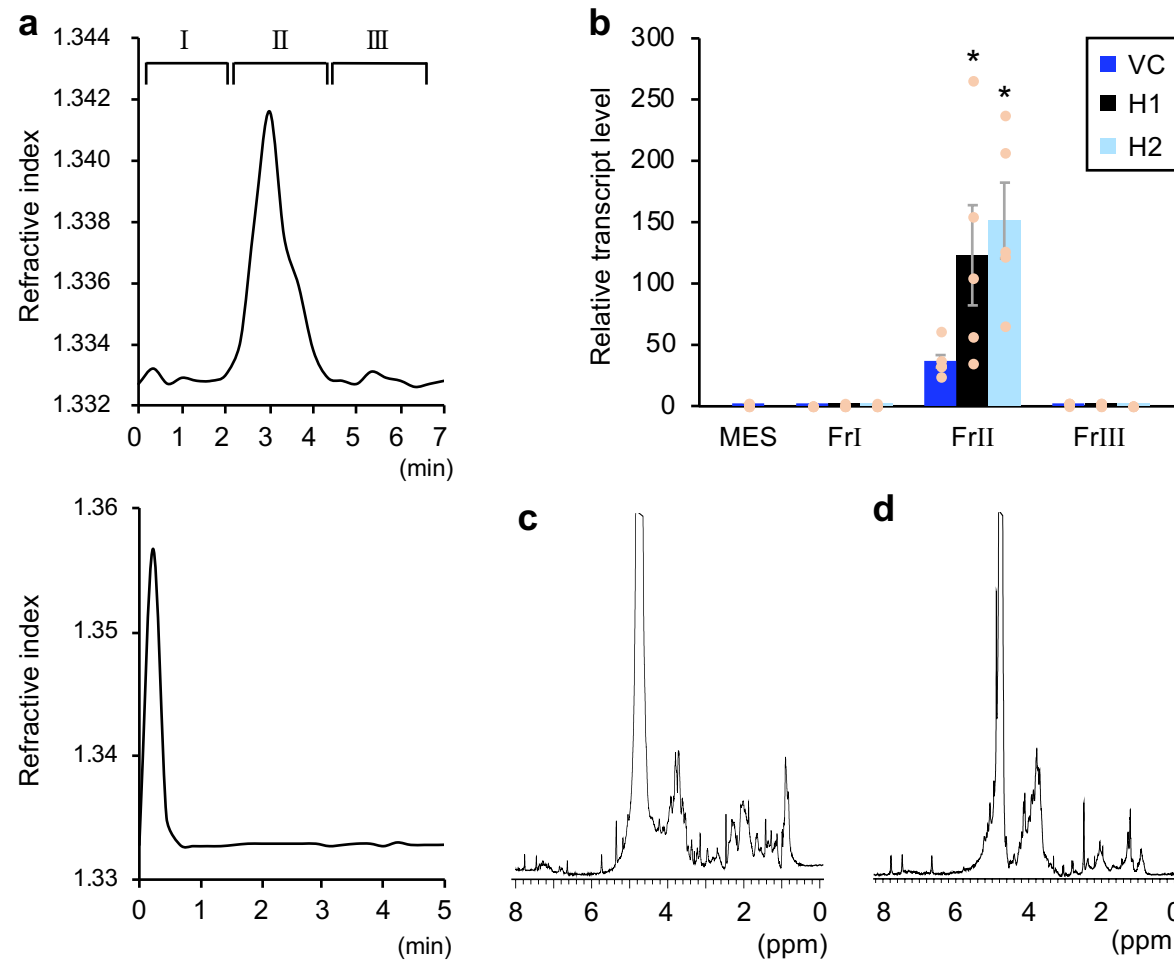

**Supplementary Figure 5: Chemical properties of FrII.** **a** Fractionation of FrA, using normal phase chromatography (top) and reverse phase chromatography (bottom). **b** Transcript level of *PDF1.2* in leaves of vector control (VC), and H1 and H2 lines at 24 h after mechanical damage with application of MES buffer or individual OS fractions obtained by normal phase chromatography. All the individual data points are shown with the means and standard errors ( $n = 5-6$ ). Data marked with an asterisk are significantly different from those of VC, based on an ANOVA with Holm's sequential Bonferroni post hoc test (\*,  $P < 0.05$ ). **c**, **d** <sup>1</sup>H NMR spectrum (600 MHz, D<sub>2</sub>O) of FrII from normal phase chromatography (**c**) in comparison to that of Frα from size exclusion chromatography (**d**).

**a**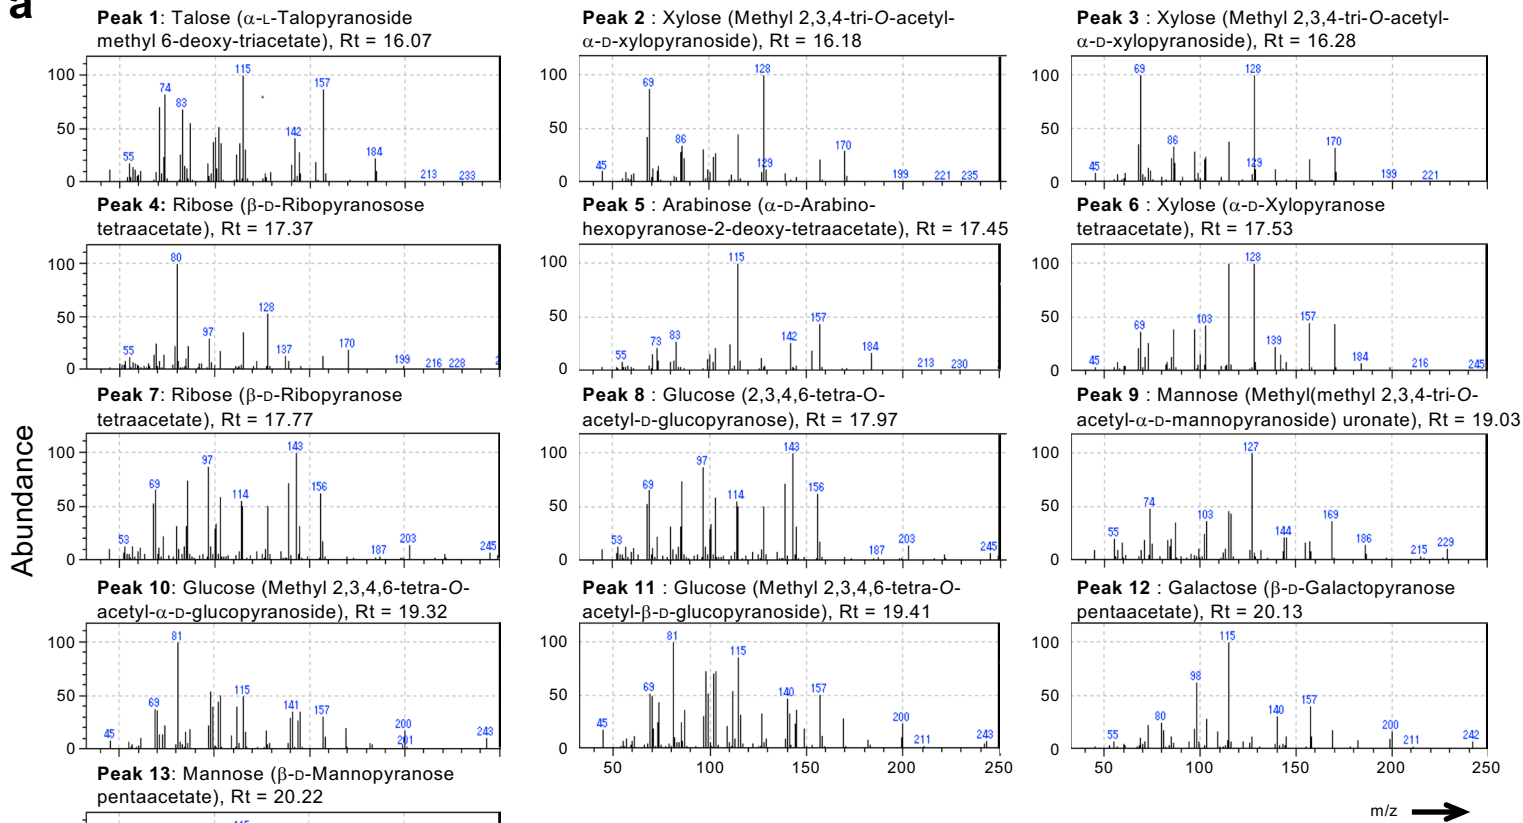**b**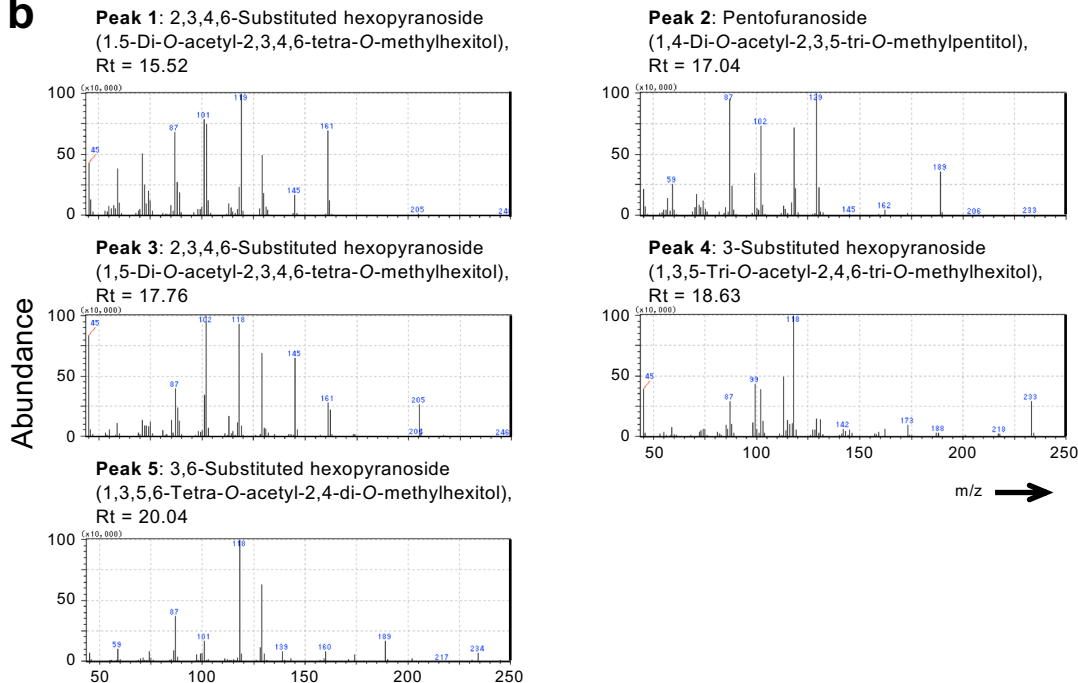

**Supplementary Figure 6:** The fragmentation patterns of GC-MS mass spectrum from the data for monosaccharide determination analysis of Fr $\alpha$  (a) and monosaccharide branching point determination analysis of Fr $\alpha$  (b) (see Figs. 2c and 2d, respectively). The peaks marked with numbers indicate the acetylated methyl glycoside derivatives.



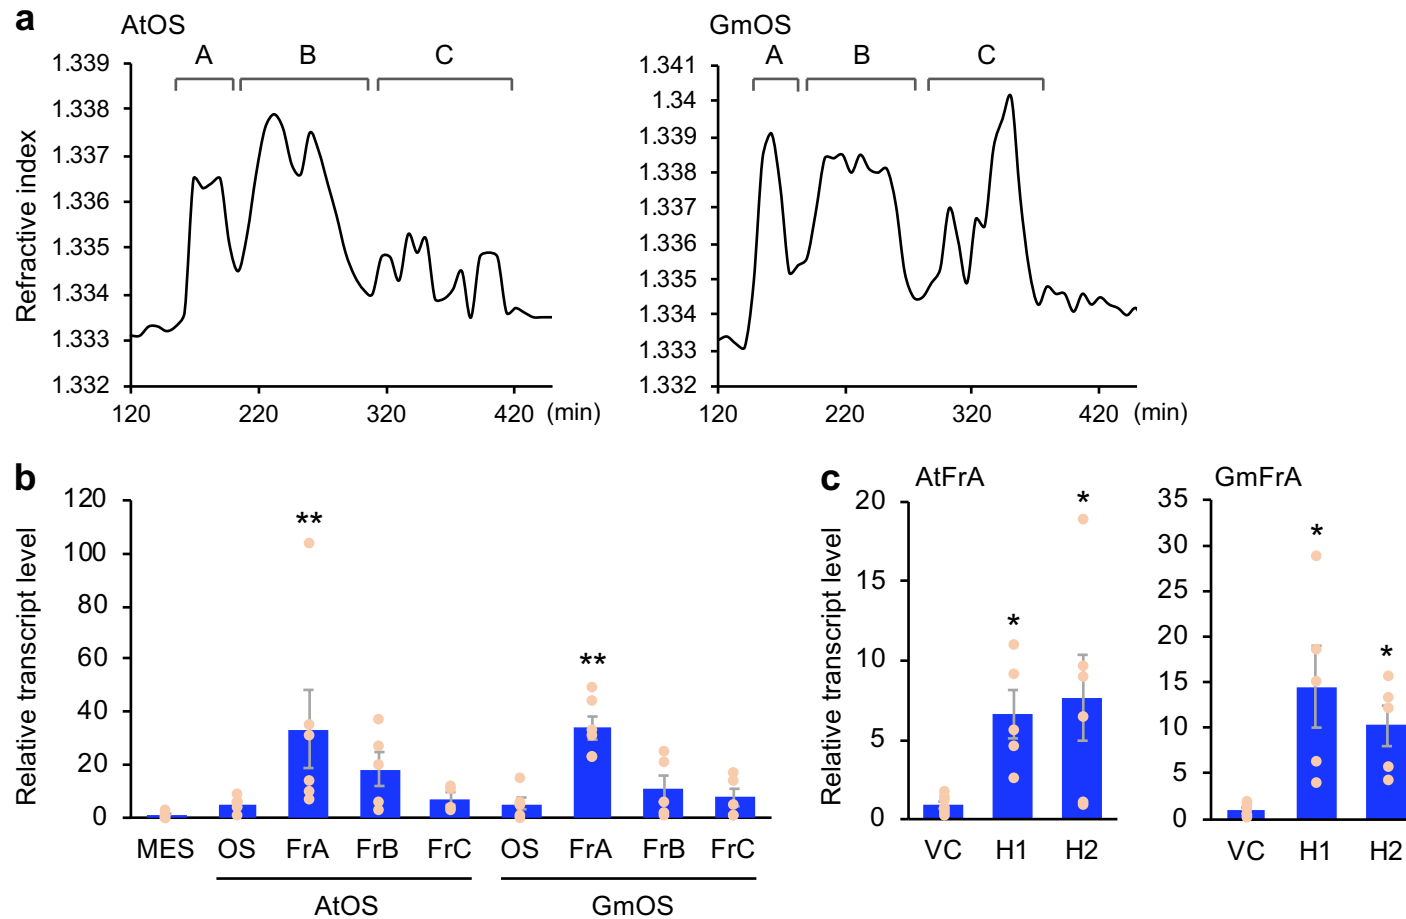

**Supplementary Figure 7: Fractionation and characterization of GmHAK-mediated components in OS from *Spodoptera litura* reared on Arabidopsis or soybean (AtOS or GmOS, respectively).** **a** Size exclusion chromatography (SEC) of Arabidopsis OS and soybean OS for components ranging in size from 100-1800 Da. **b** Transcript level of *PDF1.2* in Arabidopsis wild-type leaves at 24 h after mechanical damage with application of MES buffer, Arabidopsis OS, soybean OS or their SEC fractions (FrA, FrB or FrC). **c** Transcript level of *PDF1.2* in leaves of vector control (VC), H1, and H2 lines at 24 h after mechanical damage with application of FrA from AtOS or GmOS (AtFrA and GmFrA, respectively). All the individual data points are shown with the means and standard errors ( $n = 4-7$ ). Data marked with an asterisk are significantly different from those of MES (**b**) or VC (**c**), based on an ANOVA with Holm's sequential Bonferroni post hoc test (\*\*,  $0.001 \leq P < 0.01$ ; \*,  $0.01 \leq P < 0.05$ ).

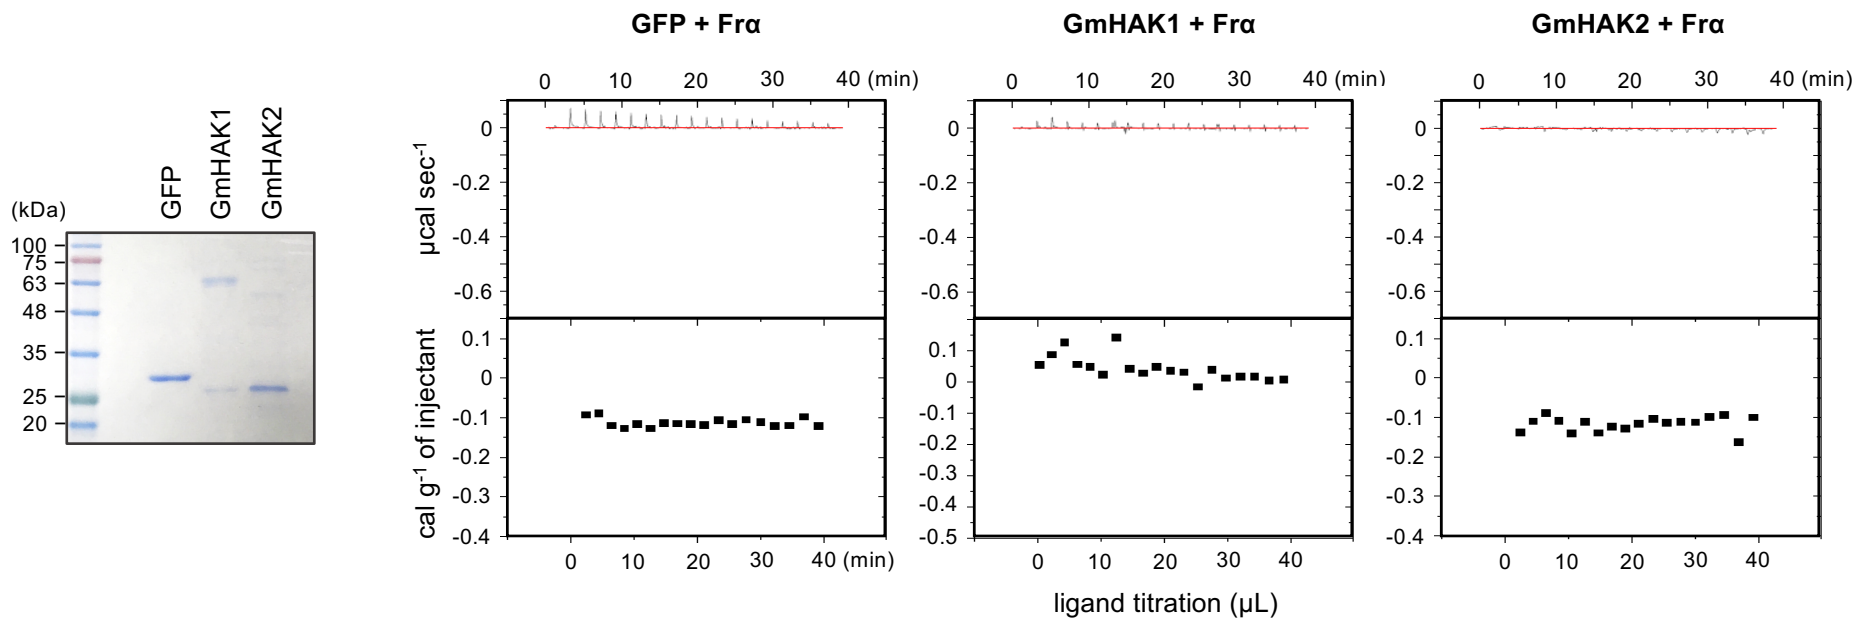

**Supplementary Figure 8: Fr $\alpha$ -binding affinity of GmHAKs.** The change of heat capacity that accompanied binding of recombinant GmHAK proteins to Fr $\alpha$  was detected using an isothermal titration calorimetry system. Upper panels and lower panels show raw data and integrated heat values, respectively. Data from Coomassie blue-stained SDS-PAGE gel of recombinant GFP and the extracellular domains of GmHAK1, and GmHAK2 proteins used are presented in the left panel.

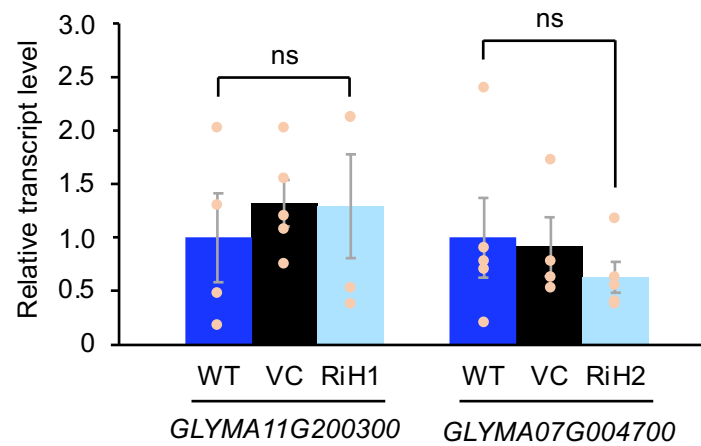

**Supplementary Figure 9: GmHAK homolog expression in GmHAK RNAi lines.** Transcript levels of genes for *GmHAK1* homolog (*GLYMA11G200300*) or *GmHAK2* homolog (*GLYMA07G004700*) in leaves of wild-type (WT) plants, vector control (VC) plants, and RNAi lines of GmHAK1 (RiH1) and GmHAK2 (RiH2). All the individual data points are shown with the means and standard errors ( $n = 4-5$ ). ns, not significant based on an ANOVA.

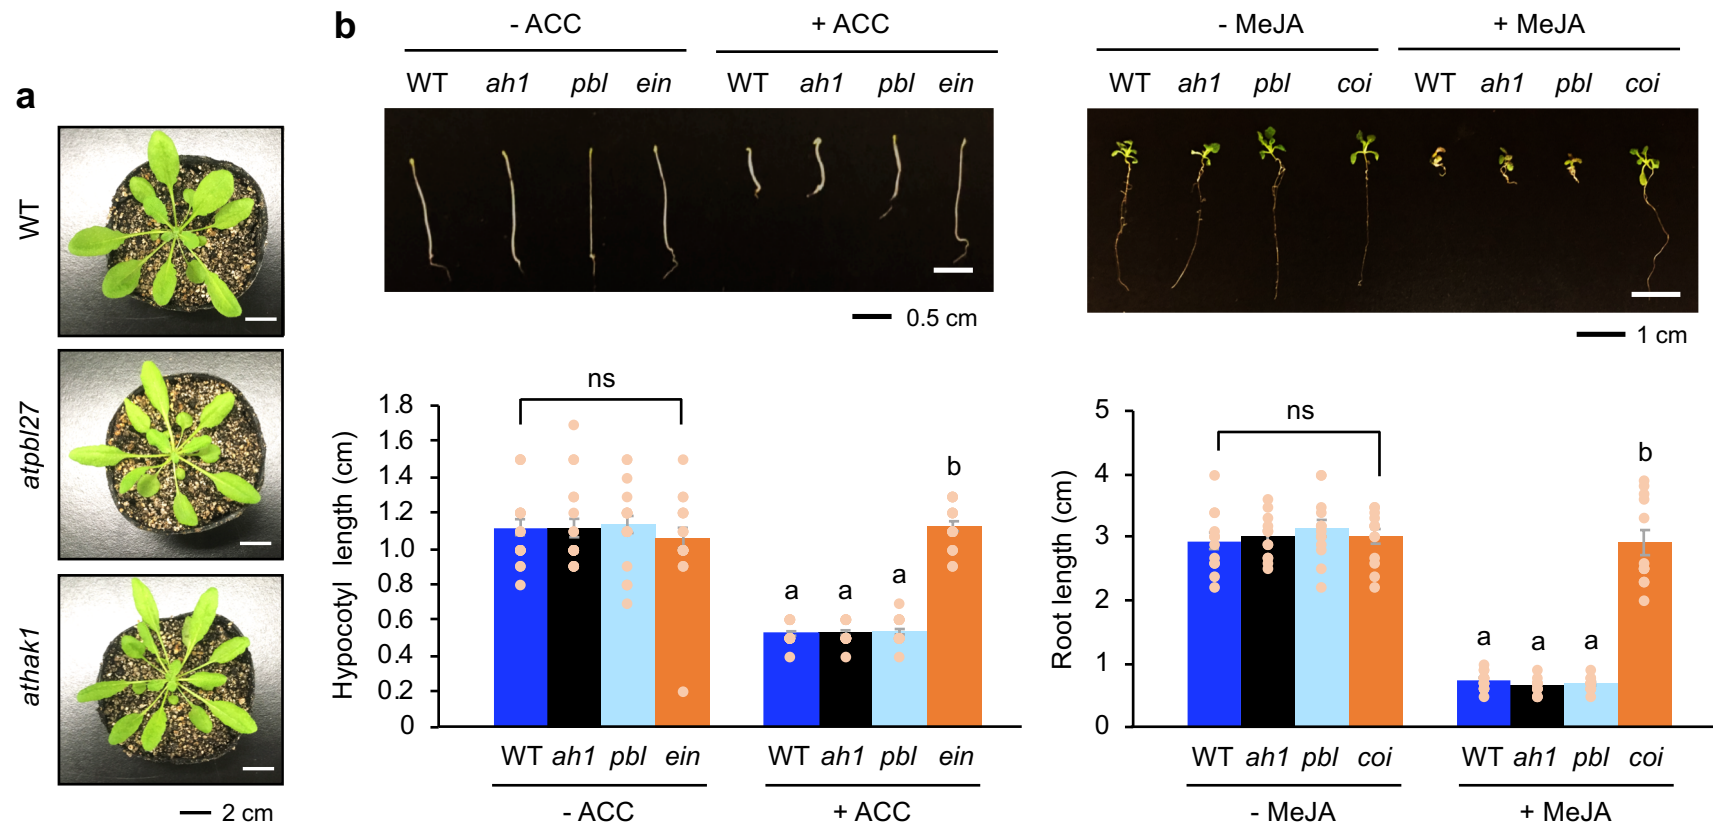

**Supplementary Figure 10: The phenotypes of *athak1* and *atpbl27* mutants.** **a** The rosette plants of wild type (WT), *athak1* and *atpbl27* grown for 4 weeks. **b** Phenotype of the sensitivity of *athak1* (*ah1*) and *atpbl27* (*pbl*) mutant seedlings to methyl jasmonate (MeJA) and an ethylene precursor 1-aminocyclopropane-1-carboxylic acid (ACC). Plant seedlings (14 days or 5 days old for MeJA and ACC, respectively) of WT, *athak1*, *atpbl27*, the coronatine-insensitive protein 1 mutant (*coi1-1* [*coi*], jasmonate insensitive mutant), and ethylene insensitive 2 (*ein2-1* [*ein*], ethylene insensitive mutant) were grown on 1/2 Murashige and Skoog medium with (+) or without (-) 50  $\mu$ M MeJA or 10  $\mu$ M ACC. Root and hypocotyl lengths were determined using ImageJ software (<https://imagej.nih.gov/ij/>). All the individual data points are shown with the means and standard errors ( $n = 12-14$  and 20 for MeJA and ACC, respectively). The means indicated by different small letters are significantly different based on an ANOVA with post hoc Tukey's HSD ( $0.001 \leq P < 0.01$ ).

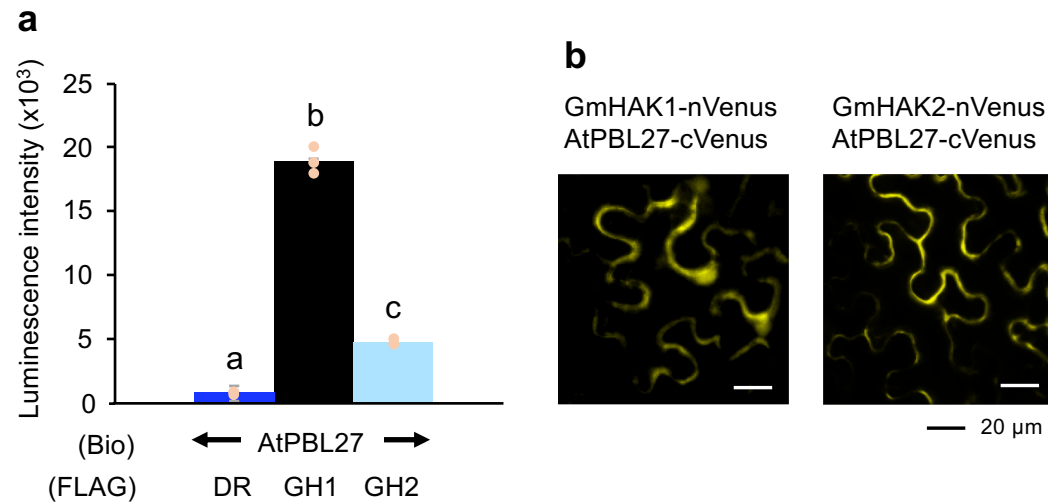

**Supplementary Figure 11: Interaction of GmHAKs and AtPBL27.** **a** Luminescence intensities based on the AlphaScreen assay to assess the interactions between biotinylated (Bio)-AtPBL27 and FLAG-conjugated proteins (FLAG) for *Escherichia coli* dihydrofolate reductase (DR) serving as control, GmHAK1 (GH1) or GmHAK2 (GH2). Proteins synthesized using the cell-free system are presented in Supplementary Fig. 12. All the individual data points are shown with the means and standard errors ( $n = 3$ ). Means indicated by different small letters are significantly different among the respective sets of data, based on a one-way ANOVA with post-hoc Tukey's HSD ( $P < 0.05$ ). **b** GmHAK1 or GmHAK2 fused to the N-terminal fragment of Venus (nVenus) and AtPBL27 fused to the C-terminal fragment of Venus (cVenus) was co-expressed in *Nicotiana benthamiana* leaf cells.

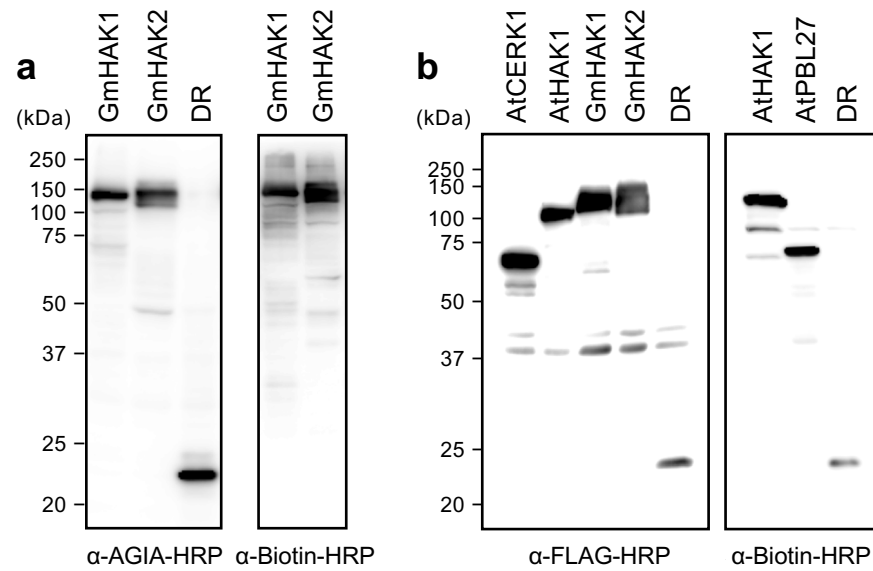

**Supplementary Figure 12: Proteins used for luminescence intensities based on the AlphaScreen assay in Fig. 3a (a) and Fig. 7a (b).** Data from Western blot analysis of AtCERK1, AtHAK1, AtPBL27, GmHAK1 and GmHAK2 proteins, and *Escherichia coli* dihydrofolate reductase (DR) serving as control, synthesized using the cell-free system, are presented.

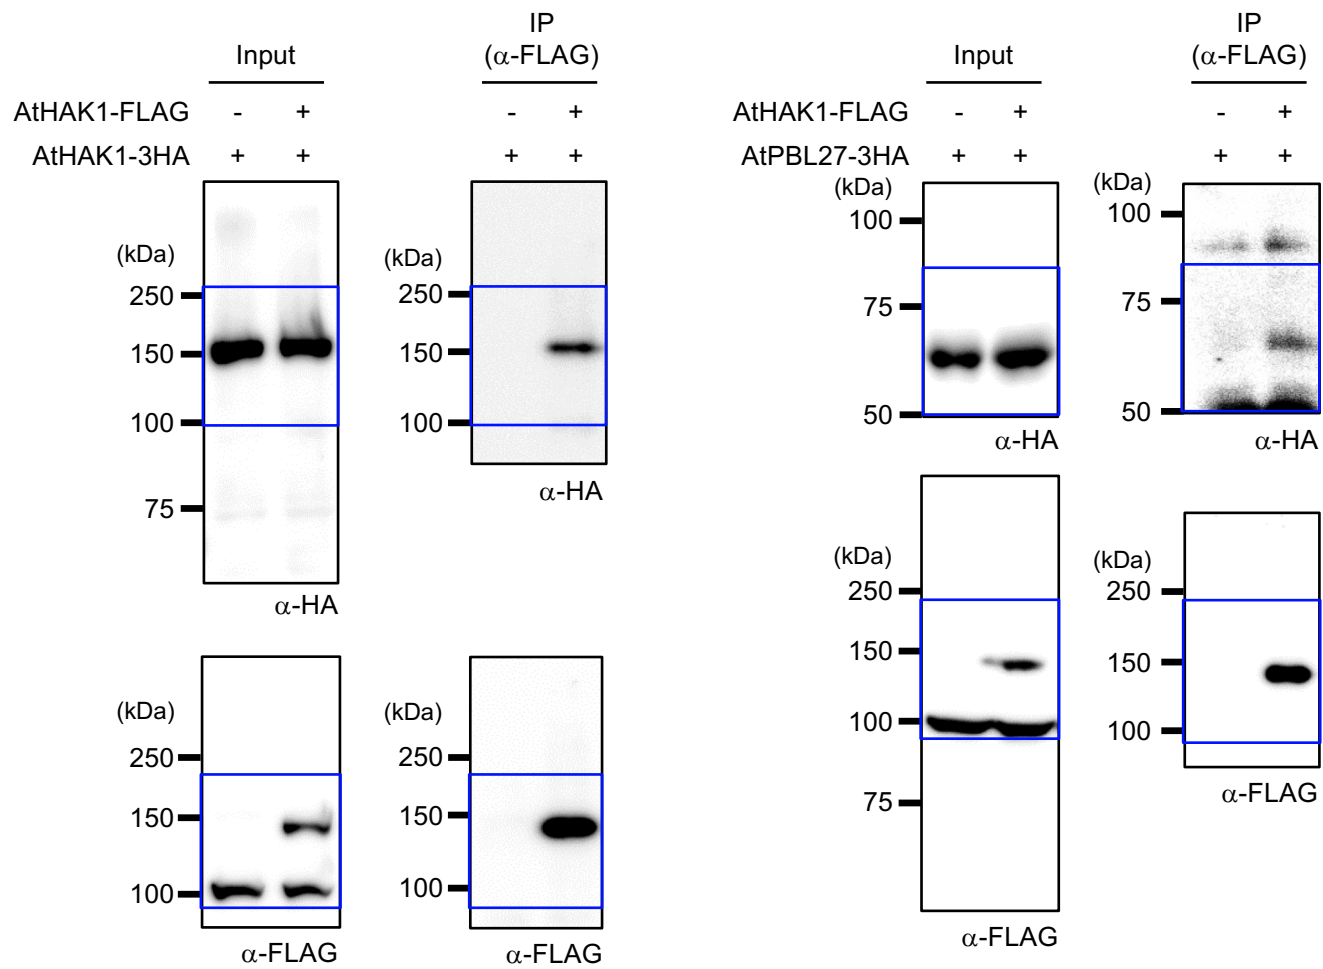

Supplementary Figure 13: Source data for Fig. 7c.
